# Supplementary material for: Viral infiltration of pancreatic islets in patients with COVID-19
Source: PubMed Central journal article supplement (PMC8192507; doi:10.1038/s41467-021-23886-3), 2021-06-10
Supplement: 41467_2021_23886_MOESM1_ESM.pdf [file 41467_2021_23886_MOESM1_ESM.pdf]

## Supplementary files, Steenblock et al.

**Supplementary Table 1. List of antibodies used**

| Antibody                                            | SOURCE                                     | Dilution | Comments                                           |
|-----------------------------------------------------|--------------------------------------------|----------|----------------------------------------------------|
| Guinea pig polyclonal anti-insulin                  | Abcam<br>Cat# ab7842                       | 1:100    | Works very well for IF.<br>IHC wasn't tested.      |
| Rabbit polyclonal anti-ACE2                         | Abcam<br>Cat# ab15348                      | 1:500    | Works well for IF.<br>IHC wasn't tested.           |
| Mouse monoclonal anti-ACE2 (clone CL4013)           | Thermo Fisher Scientific<br>Cat# MA5-31394 | 1:10,000 | Works ok for IF.<br>IHC wasn't tested.             |
| Goat polyclonal anti-ACE2                           | R&D Systems<br>Cat# AF933                  | 1:100    | Doesn't work for IF.<br>IHC wasn't tested.         |
| Rabbit polyclonal anti-DPP4                         | Proteintech<br>Cat# 10940-1-AP             | 1:50     | Works well for IF.<br>IHC wasn't tested.           |
| Rabbit monoclonal anti-TMPRSS2 (clone EPR3861)      | Abcam<br>Cat# ab92323                      | 1:1,000  | Works well for IF.<br>IHC wasn't tested.           |
| Mouse monoclonal anti-TMPRSS2 (clone H-4)           | Santa Cruz Biotechnology<br>Cat# sc515727  | 1:100    | Seems to work for IF but<br>also nuclear staining. |
| Rabbit monoclonal anti-pMLKL (clone EPR9514)        | Abcam<br>Cat# ab187091                     | 1:250    | Works well for IF and<br>IHC.                      |
| Mouse monoclonal anti-SARS-CoV-2-N (clone FIPV3-70) | Santa Cruz Biotechnology<br>Cat# sc65653   | 1:100    | Works ok for IF.<br>IHC wasn't tested.             |
| Rabbit polyclonal anti-SARS-CoV-2-N                 | Genetex<br>Cat# GTX135361                  | 1:500    | Works ok for IHC.<br>IF wasn't tested.             |
| Rabbit polyclonal anti-SARS-CoV-2-S                 | Genetex<br>Cat# GTX135360                  | 1:500    | Didn't work for IF.<br>IHC wasn't tested.          |
| Rabbit monoclonal anti-VCAM-1 (clone EPR5047)       | Abcam<br>Cat# ab134047                     | 1:250    | Works well for IF.<br>IHC wasn't tested.           |
| Rabbit monoclonal anti-NRP1 (clone EPR3113)         | Abcam<br>Cat# ab81321                      | 1:250    | Works well for IF.<br>IHC wasn't tested.           |
| Rabbit monoclonal anti-HMBG1 (clone EPR3507)        | Abcam<br>Cat# ab79823                      | 1:250    | Works well for IF.<br>IHC wasn't tested.           |
| Rabbit monoclonal anti-CD45 (clone D9M8I)           | Cell Signaling<br>Cat# 13917               | 1:200    | Works well for IF.<br>IHC wasn't tested.           |
| A488-goat-anti-rabbit                               | Jackson ImmunoResearch<br>Cat# 111-545-144 | 1:500    | -                                                  |
| Cy3-goat-anti-rabbit                                | Jackson ImmunoResearch<br>Cat#111-165-144  | 1:500    | -                                                  |
| A647-goat-anti-rabbit                               | Thermo Fisher Scientific<br>Cat# A21246    | 1:200    | -                                                  |
| Cy3-donkey-anti-guinea pig                          | Jackson ImmunoResearch<br>Cat# 706-165-148 | 1:500    | -                                                  |
| A488-goat-anti-mouse                                | Abcam<br>Cat# ab150113                     | 1:500    | -                                                  |
| Cy3-donkey-anti-goat                                | Jackson ImmunoResearch<br>Cat# 705-165-147 | 1:500    | -                                                  |

Ctrl #1

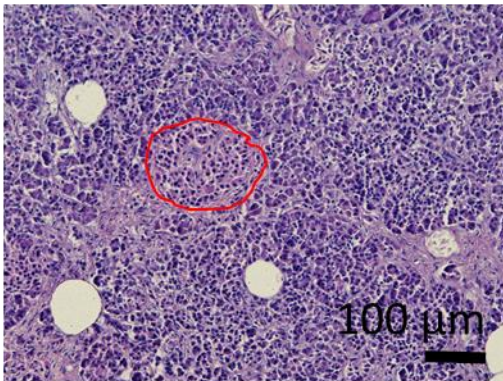

Ctrl #1

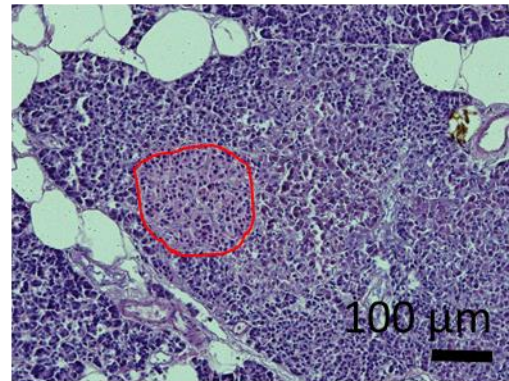

COVID-19 #5

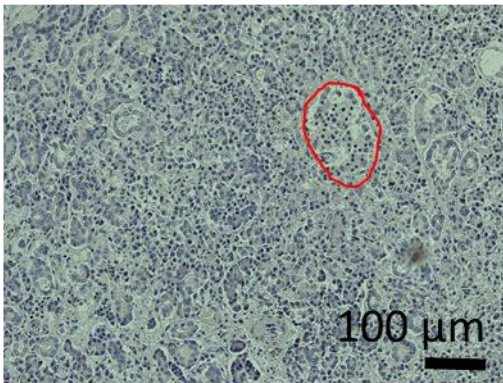

COVID-19 #8

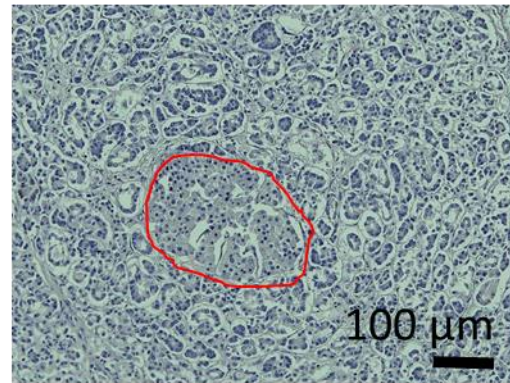

COVID-19 #11

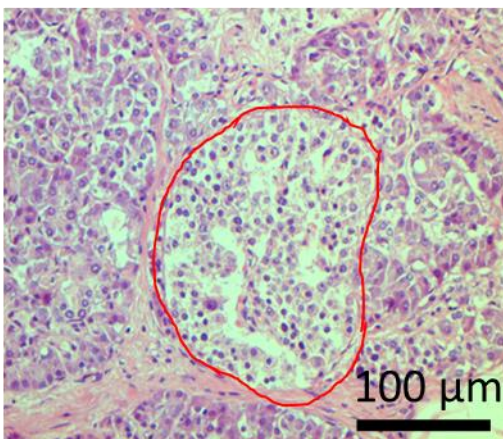

**Supplementary Figure 1. H&E stainings of selected pancreas control and COVID-19 patient tissues. Representative images from one experiment (n=1) are shown. Scale bars, 100 μm.**

## Intact islets

Ctrl #3

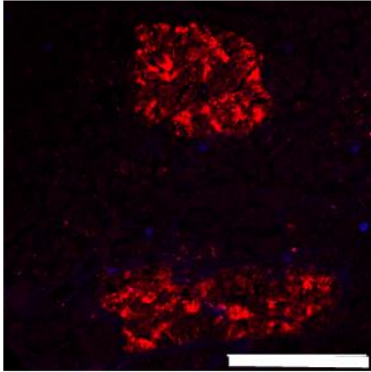

COVID-19 #2

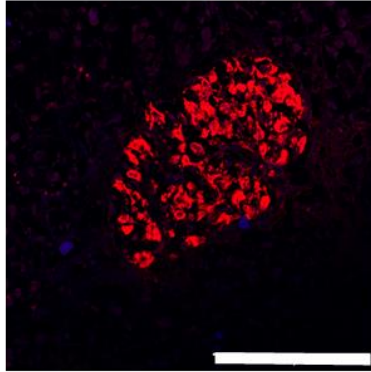

## Impaired islets

Sepsis #1

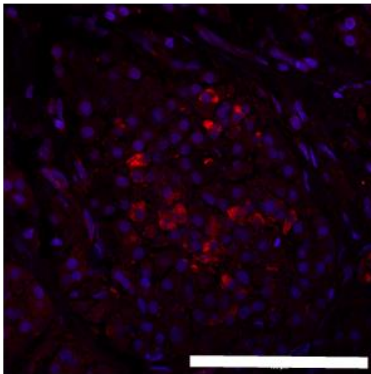

COVID-19 #2

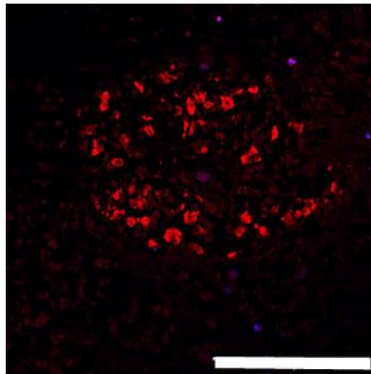

COVID-19 #6

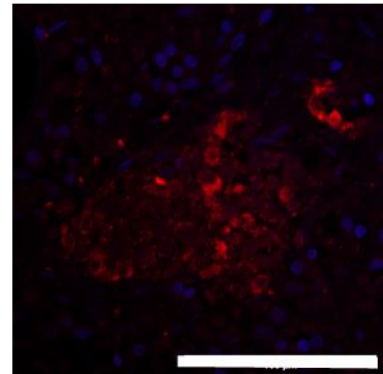

COVID-19 #7

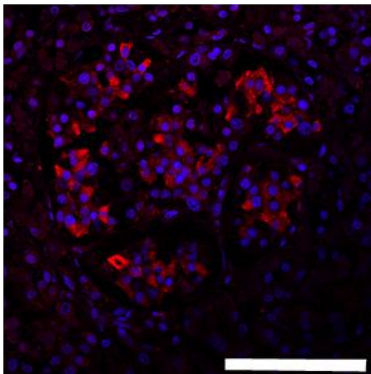

COVID-19 #8

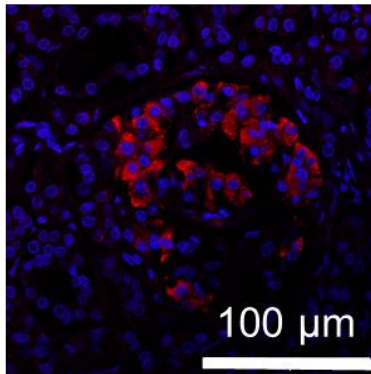

**Supplementary Figure 2. Insulin stainings of selected pancreas control and COVID-19 patient tissues.** In the control tissue, all islets are intact. In COVID-19 patients, intact and impaired islets are detected. Representative images from eight independent experiments (n=8) are shown.



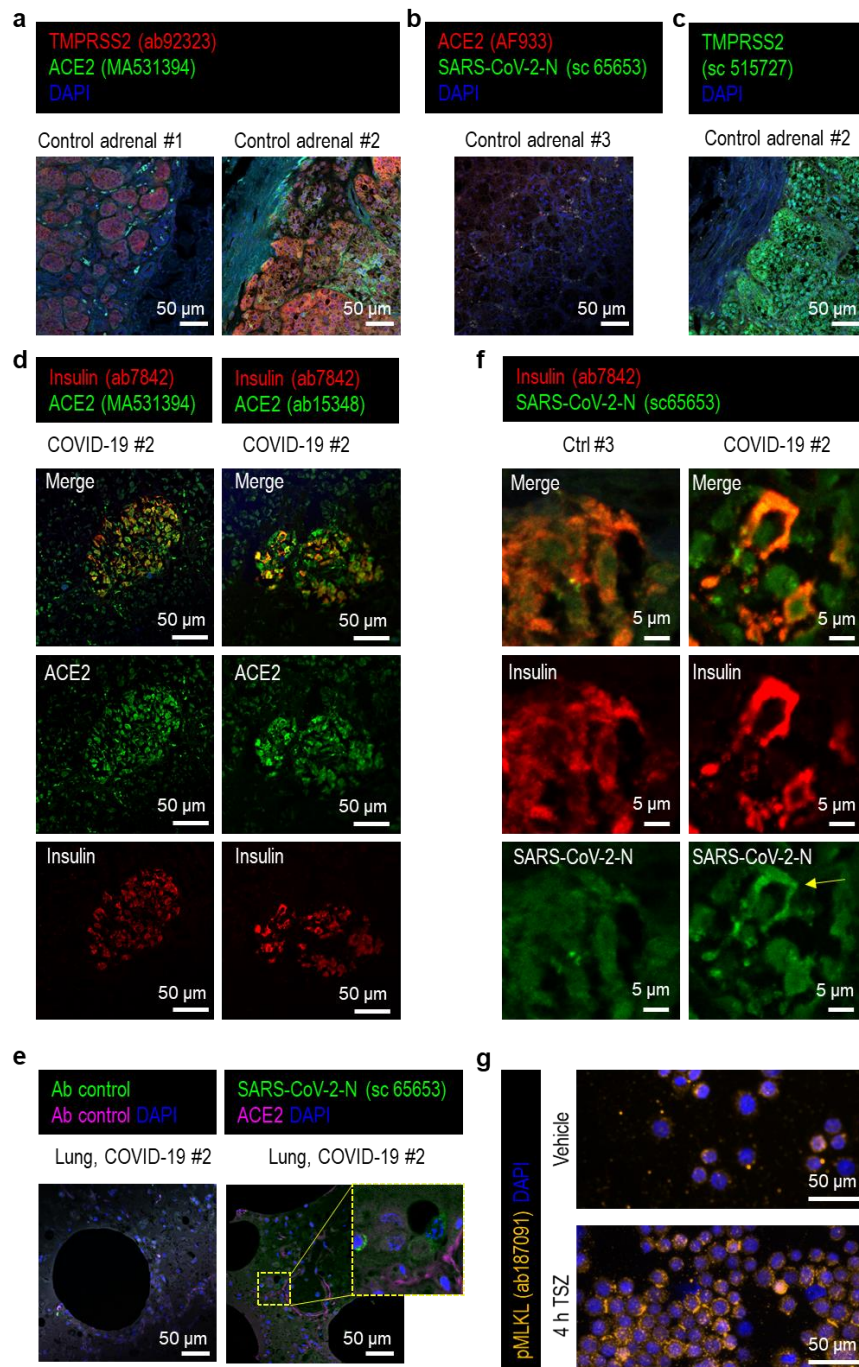

**Supplementary Figure 3. Antibody validation.** **a-c.** Different antibodies were tested in immunostainings on human adrenal tissue. Anti-TMPRSS2 (ab92323) worked and therefore this antibody was chosen for further stainings (n=3). Anti-TMPRSS2 (sc 515727) showed a similar staining pattern but also in the nucleus (n=1). Anti-ACE2 (MA531394) works (n=3). Anti-ACE2 (AF933) didn't work (n=1). No staining of SARS-CoV-2 Nucleocapsid protein (SARS-CoV-2-N) was observed on human control adrenal tissue (not from COVID-19 patients) (n=1). **d.** Two ACE2 antibodies (MA531394 and ab 15348) were compared on pancreas tissue and showed similar stainings (n=3). **e+f.** Anti-SARS-CoV-2-N (sc65653) works on positive lung control tissue and on pancreas tissue from the same patient (n=2). **g.** Anti-pMLKL (ab187091) was tested on HT29 cells where necroptosis was induced (n=2). Representative images are shown.

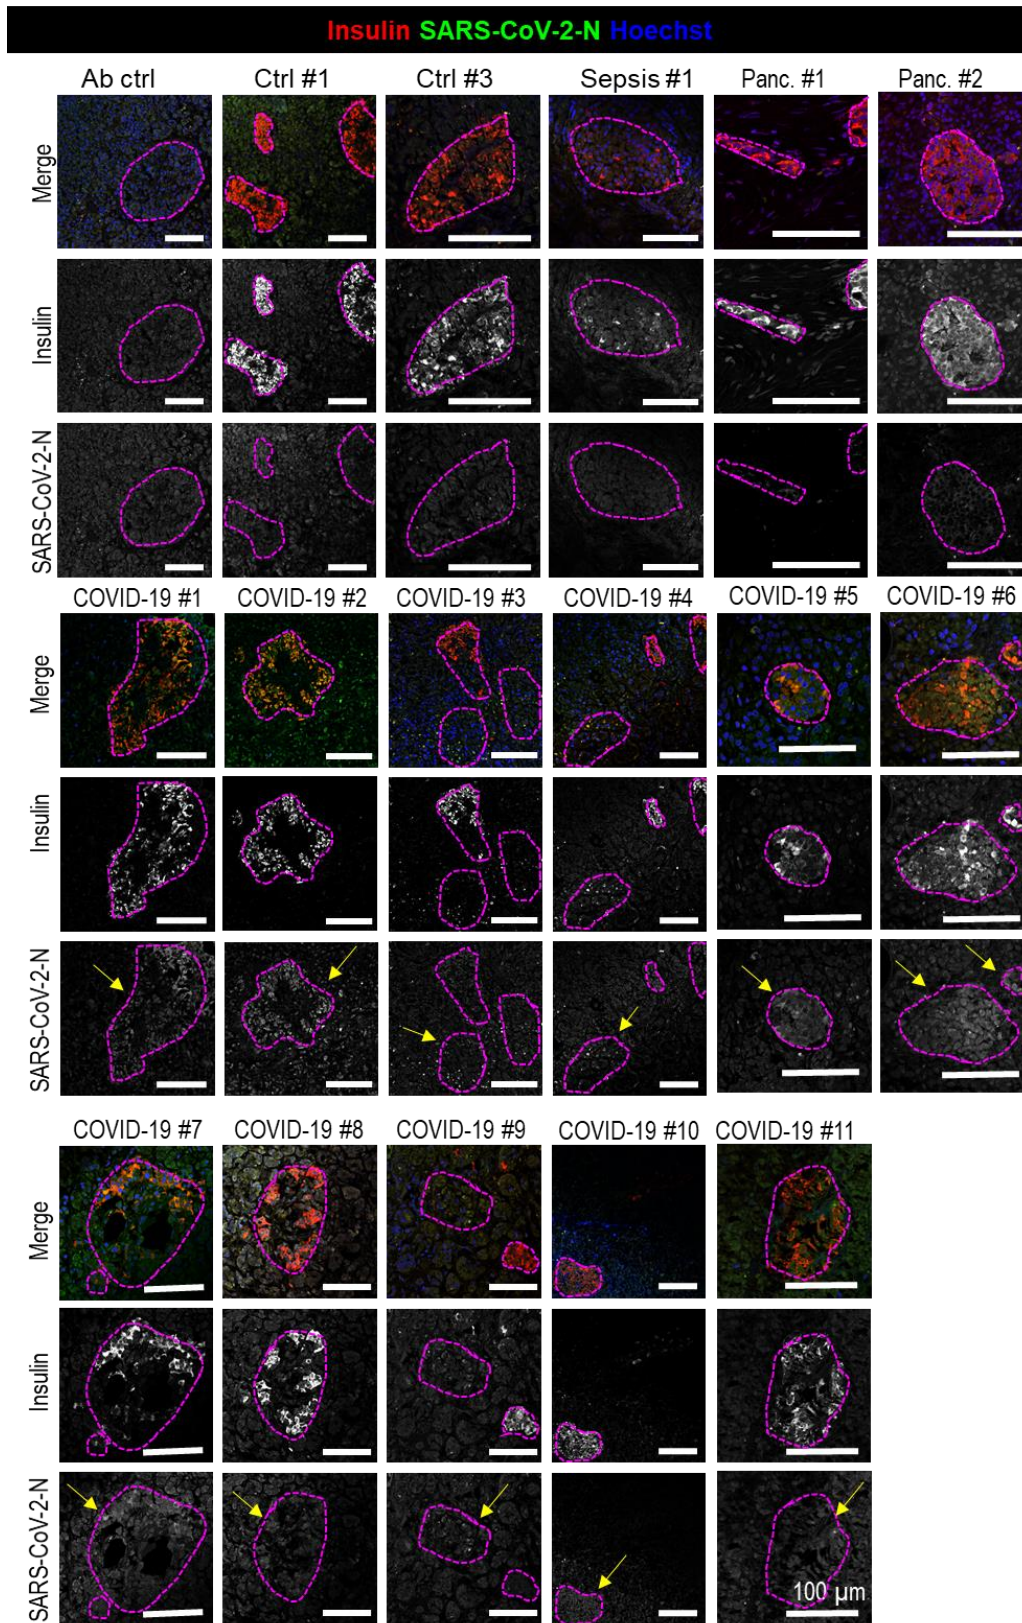

**Supplementary Figure 4. SARS-CoV-2 infection leads to viral infiltration in the pancreas.** Immunostainings of pancreas sections from COVID-19 patients using antibodies against insulin and SARS-CoV-2-N (sc65653). Secondary antibodies alone are seen in “Ab control”. Islets are indicated. Representative images from three independent experiments (n=3) are shown. Scale bars, 100  $\mu$ m.



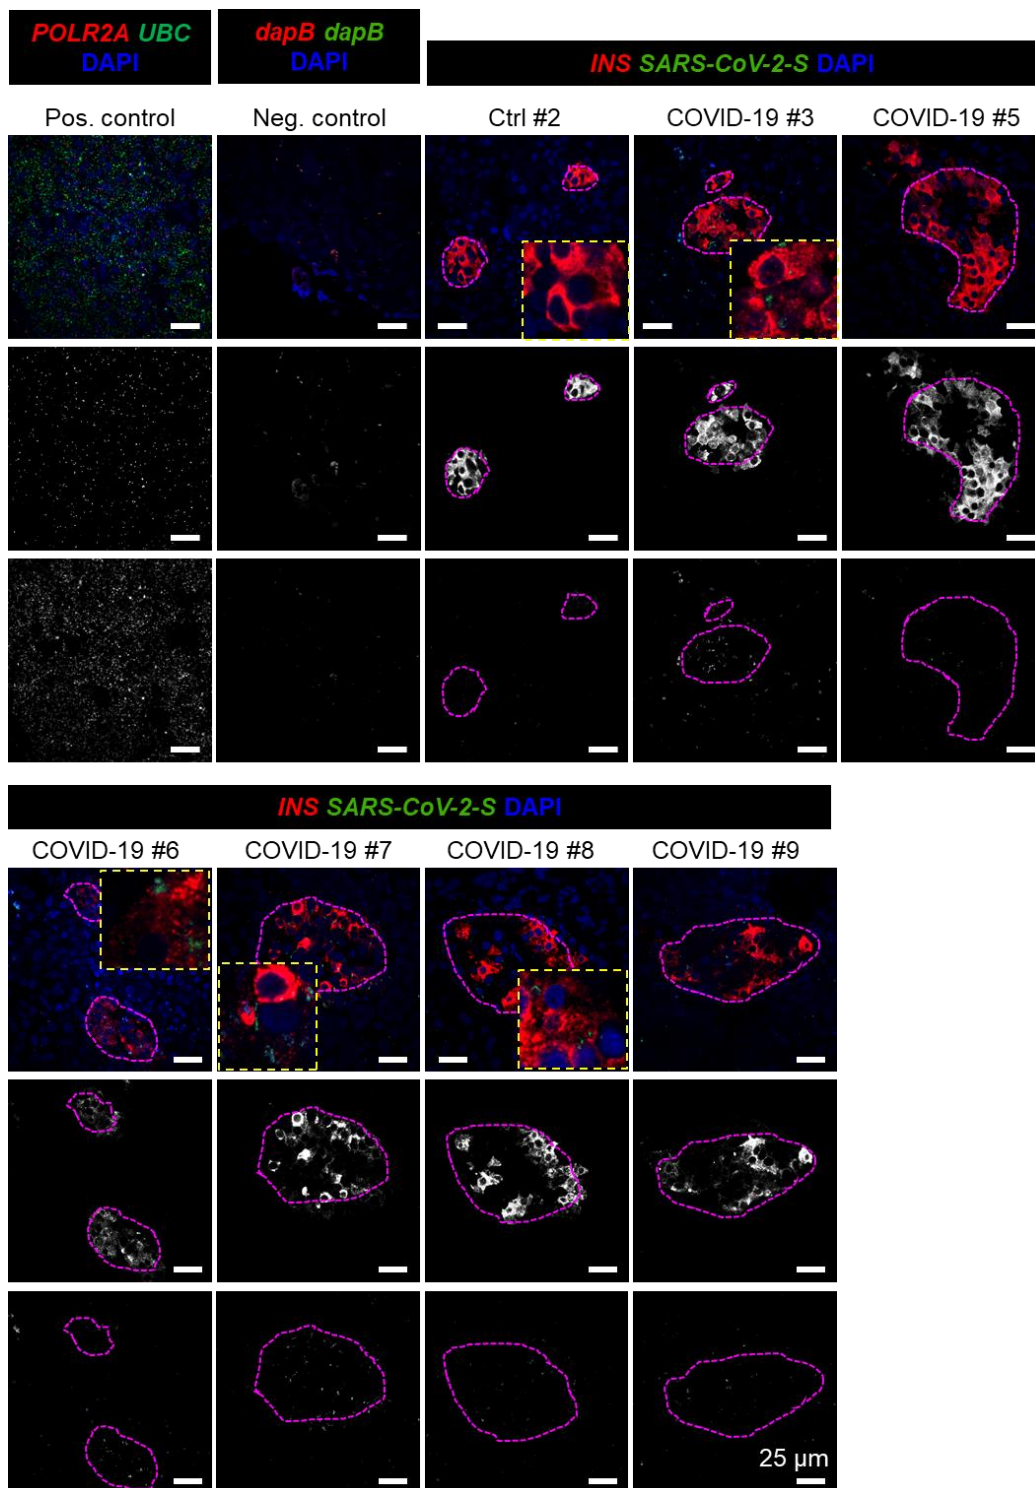

**Supplementary Figure 5. SARS-CoV-2 infection leads to viral infiltration in the pancreas.** RNA scope on pancreatic tissue from COVID-19 patients using probes targeting *INS* and *SARS-CoV-2-S*. As positive control, probes targeting *POLR2A* and *UBC* were used. As negative control, probes targeting the *DapB* gene from the *Bacillus subtilis* strain SMY were used. Islets are indicated. Representative images from two independent experiments (n=2) are shown. Scale bars, 25  $\mu$ m.

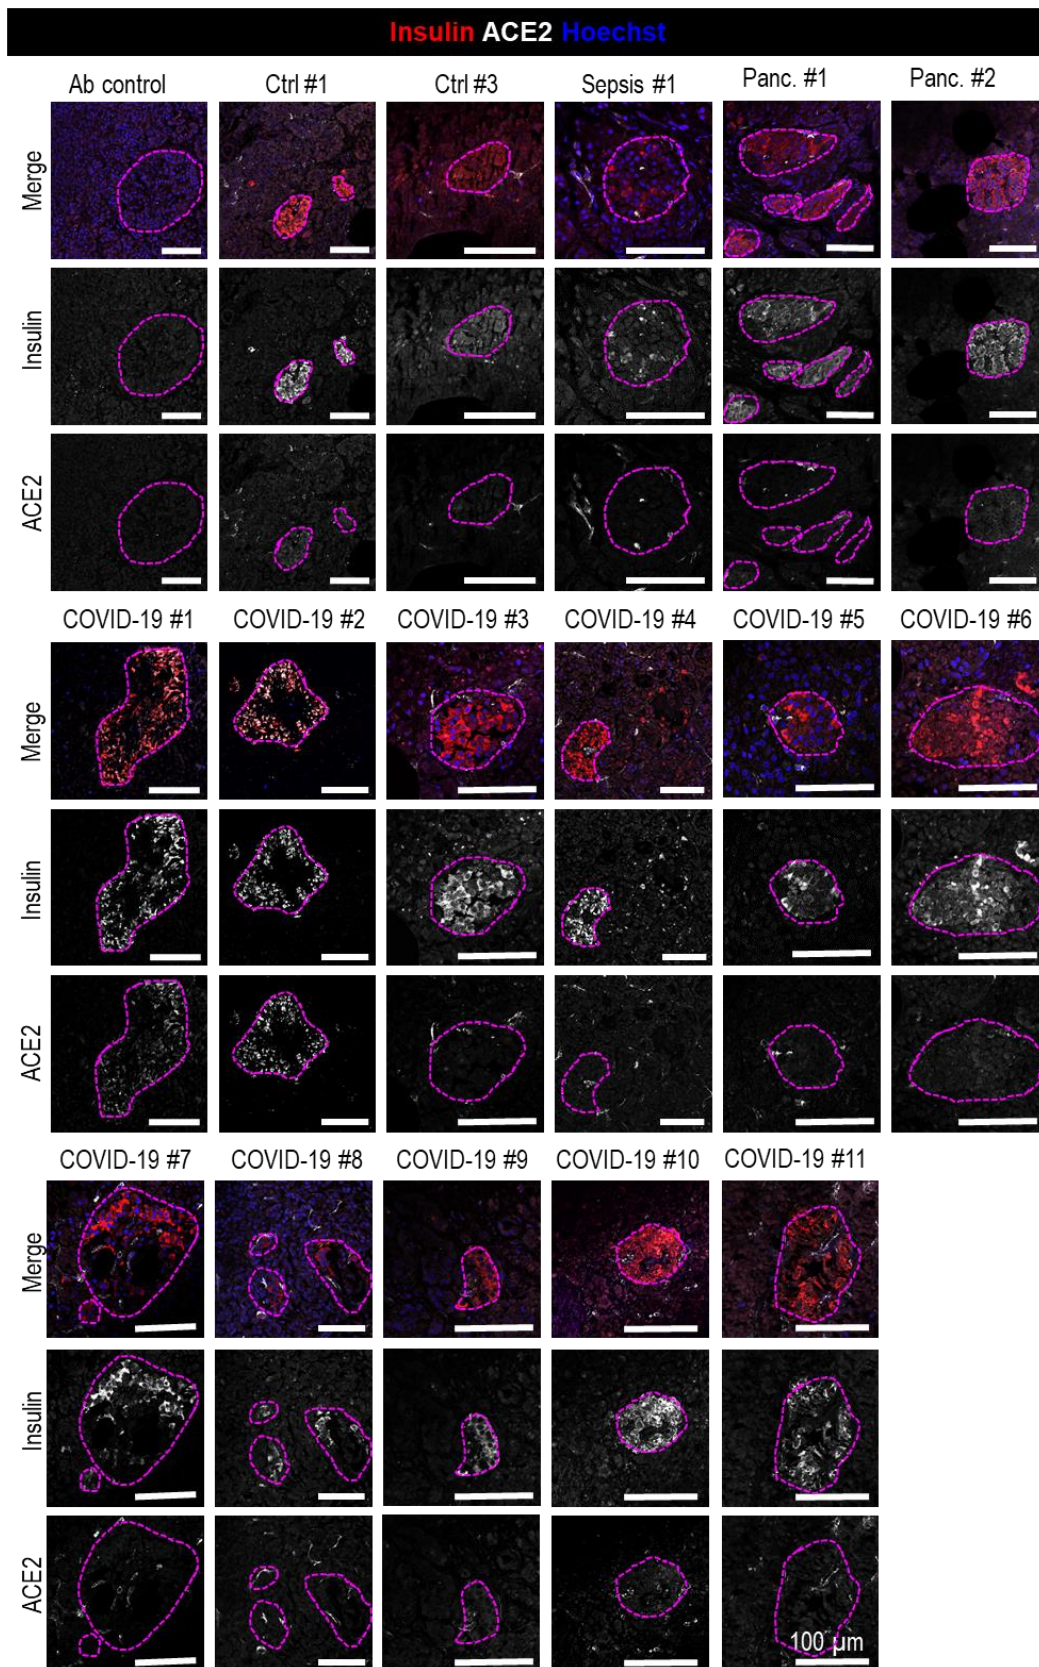

**Supplementary Figure 6. The SARS-CoV-2 receptor ACE2 is expressed in the human pancreas.** Pancreas sections from control and COVID-19 patients were stained for insulin to mark beta-cells. Additionally, double stainings for ACE2 were performed. Secondary antibodies alone are seen in “Ab control”. Islets are indicated. Representative images from three independent experiments (n=3) are shown. Scale bars, 100  $\mu$ m.



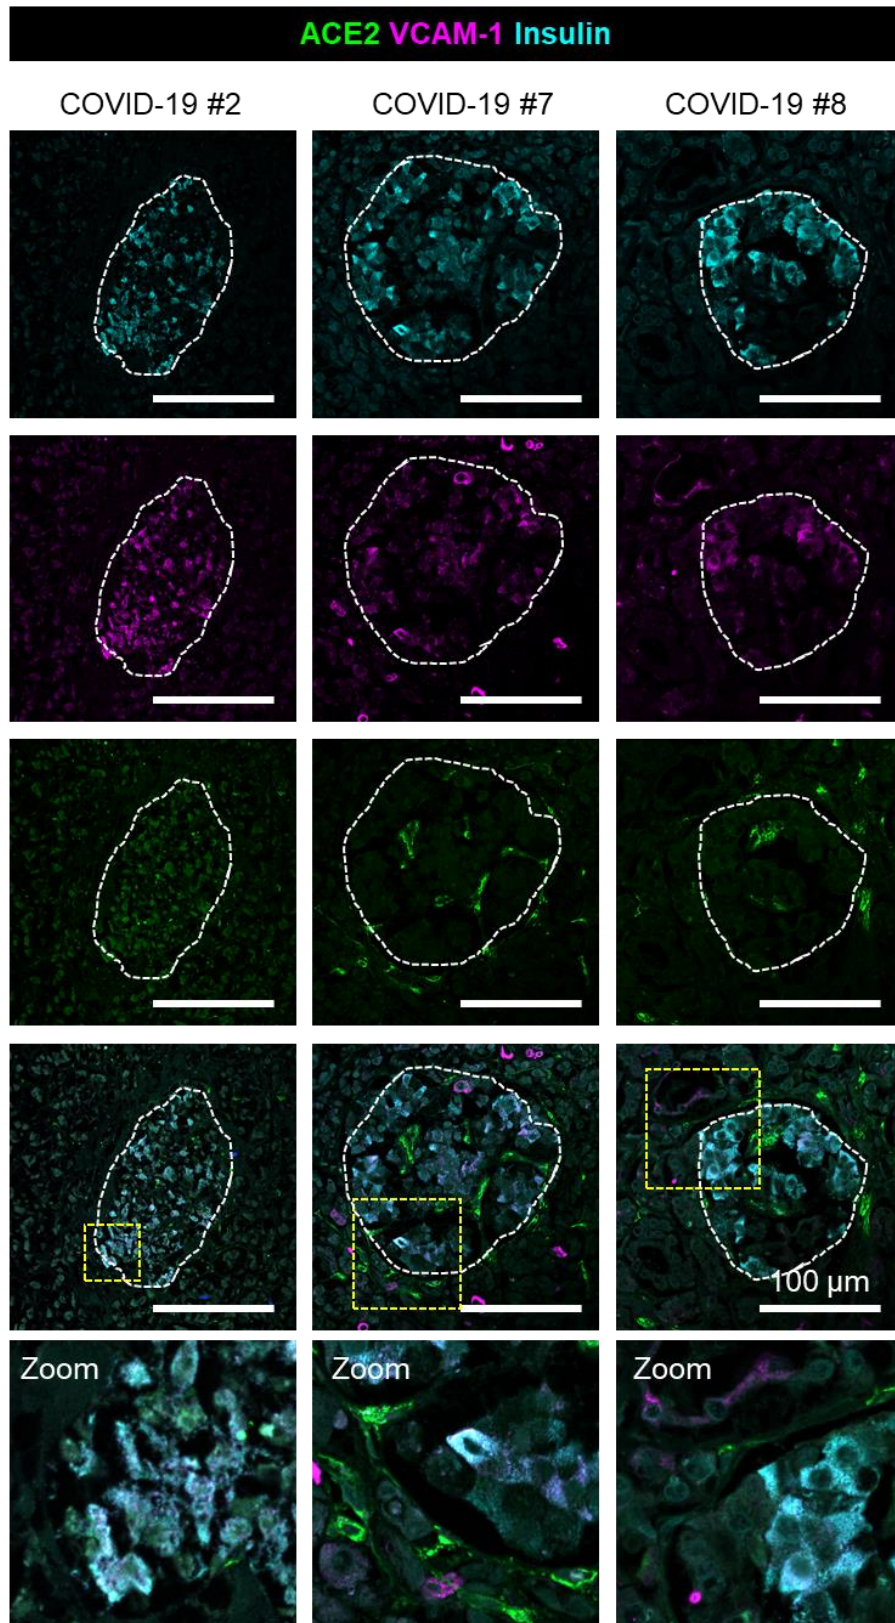



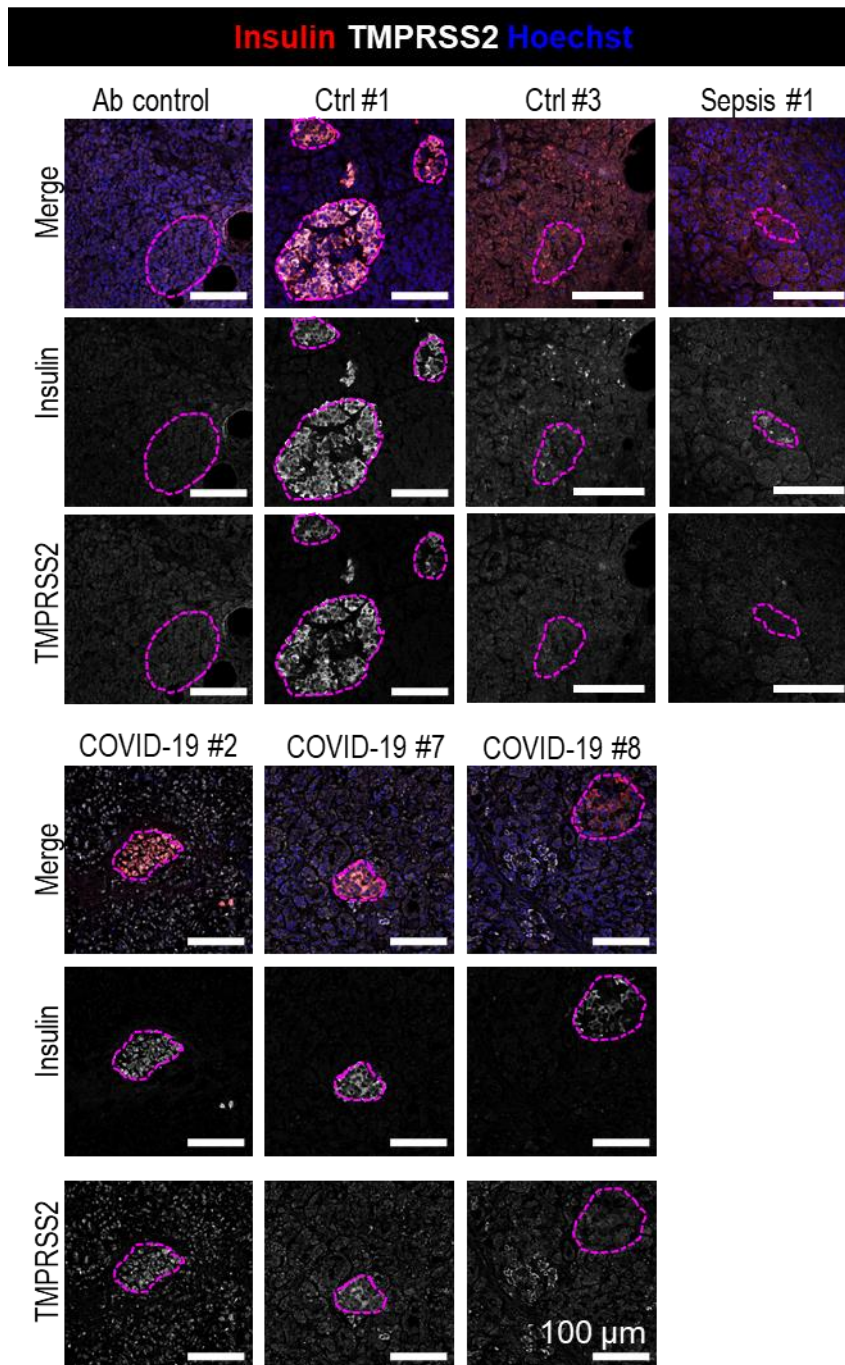

**Supplementary Figure 8. SARS-CoV-2 protease important for cell entry is expressed in the human pancreas.** Pancreas sections from control and COVID-19 patients were stained for insulin to mark beta-cells. Additionally, double stainings for TMPRSS2 were performed. Secondary antibodies alone are seen in “Ab control”. Islets are indicated. Representative images from three independent experiments (n=3) are shown. Scale bars, 100  $\mu$ m.

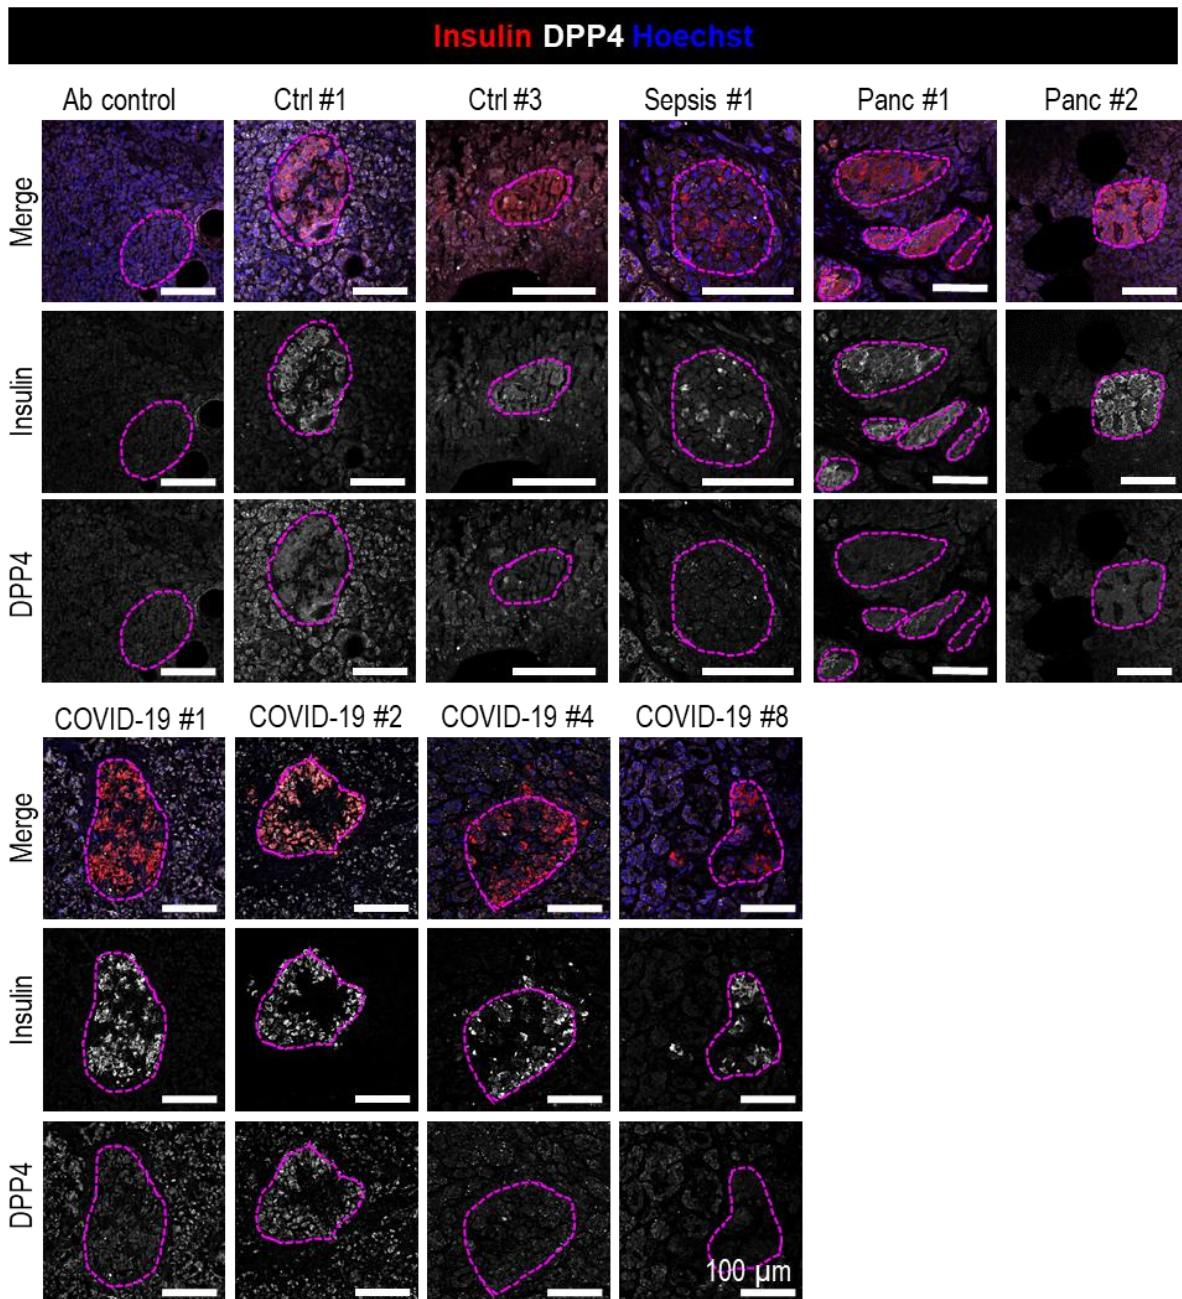

**Supplementary Figure 9. SARS-CoV-2 alternative receptor DPP4 is expressed in the human pancreas.** Pancreas sections from control and COVID-19 patients were stained for insulin to mark beta-cells. Additionally, double stainings for DPP4 were performed. Secondary antibodies alone are seen in “Ab control”. Islets are indicated. Representative images from two independent experiments (n=2) are shown. Scale bars, 100  $\mu$ m.



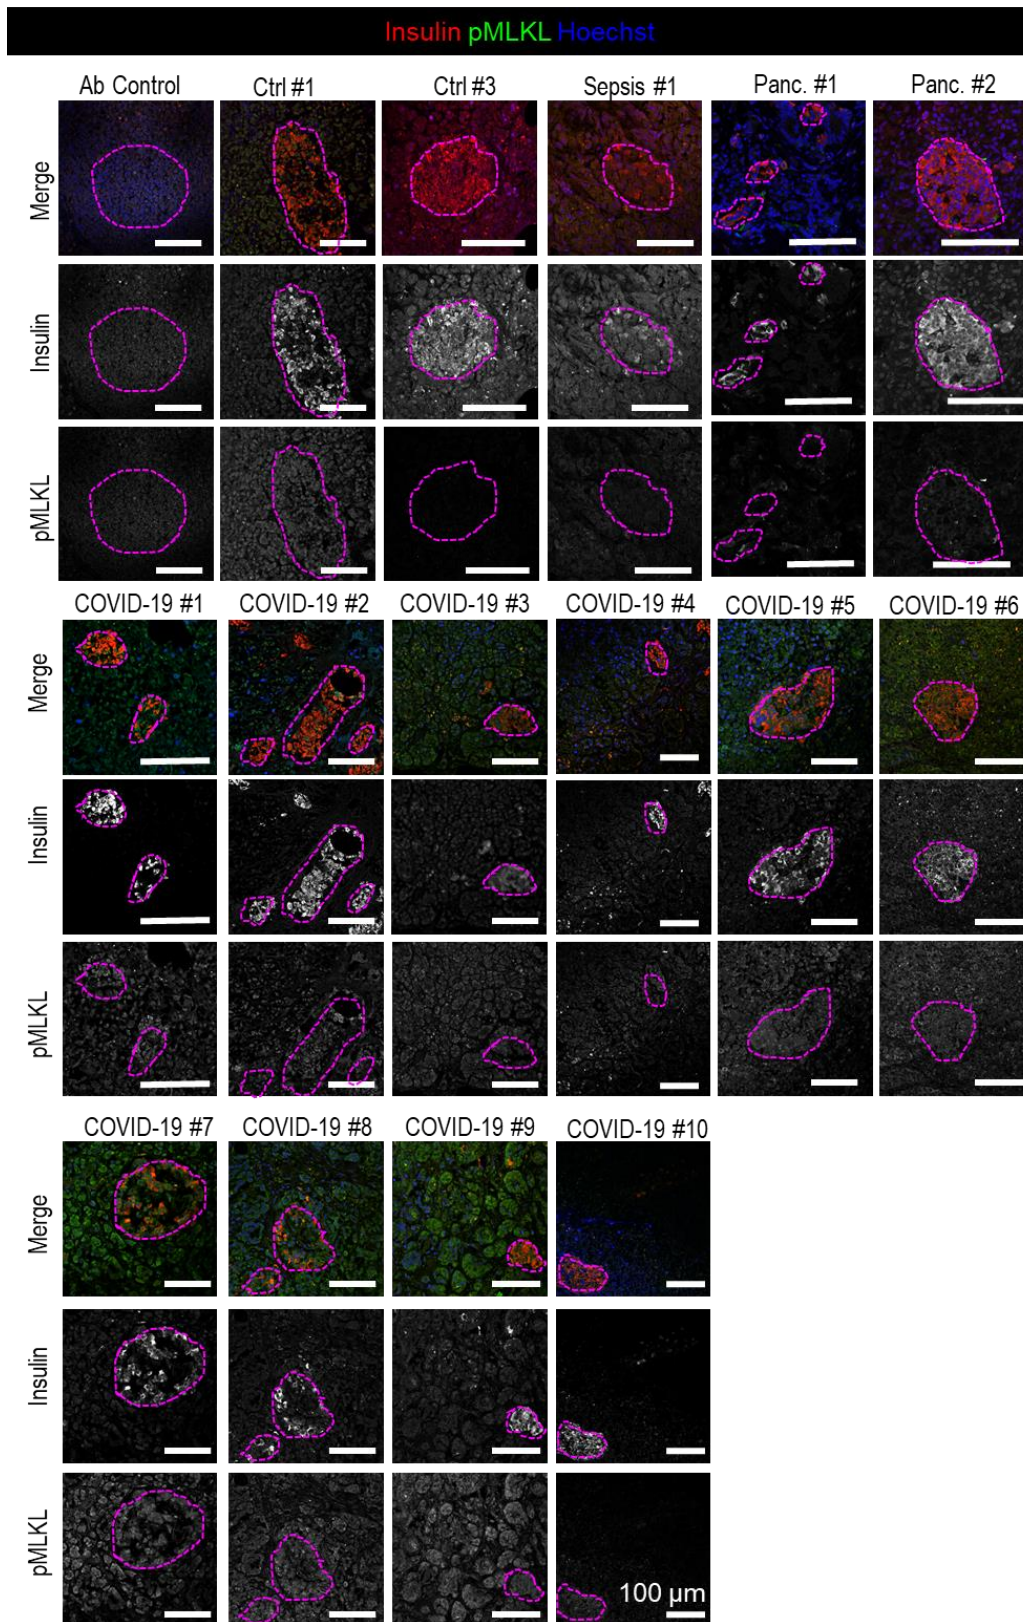

**Supplementary Figure 10. SARS-CoV-2 infection leads to necroptosis in the pancreas.** Immunofluorescent stainings of pancreas sections from COVID-19 patients using antibodies against insulin and pMLKL. Secondary antibodies alone are seen in “Ab control”. Islets are indicated. Representative images from three independent experiments (n=3) are shown. Scale bars, 100 μm.

**a**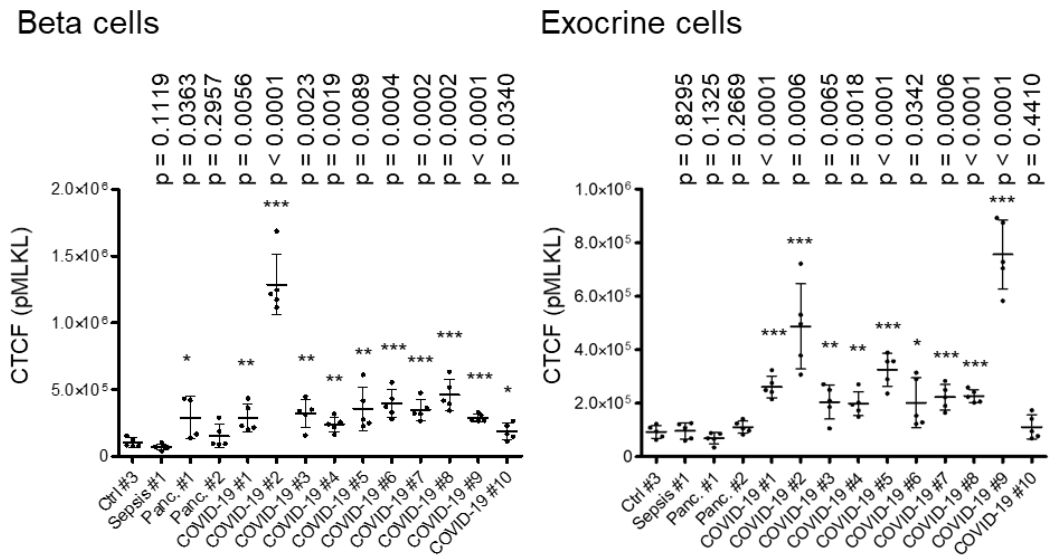**b****COVID-19 #7**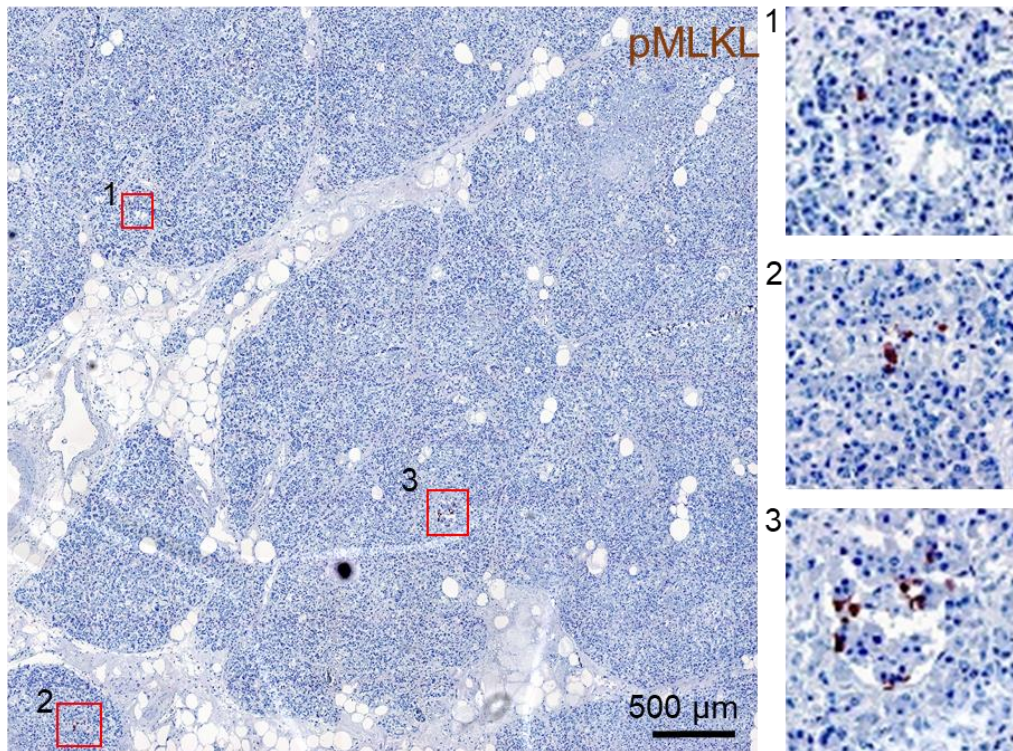

**Supplementary Figure 11. SARS-CoV-2 infection leads to necroptosis in the pancreas.** **a** Dot blots of pMLKL cellular fluorescence in beta-cells and exocrine cells measured on one ( $n=1$ ) of three independent stainings in Supplementary Fig. 10. Quantification of calculated total cellular fluorescence (CTCF) was performed on  $n=5$  cells from  $n \geq 2$  images per patient. Data were analyzed by unpaired two-sided  $t$ -test by comparison with Ctrl #3. Data are presented as mean  $\pm$  SD.  $p$  values are indicated. \*  $p < 0.05$ , \*\* $p < 0.01$ ; \*\*\* $p < 0.001$ . **b** Immunohistochemistry of pMLKL in a pancreatic section from COVID-19 patient #7. A representative image from one experiment ( $n=1$ ) is shown. Scale bar, 500  $\mu\text{m}$ .



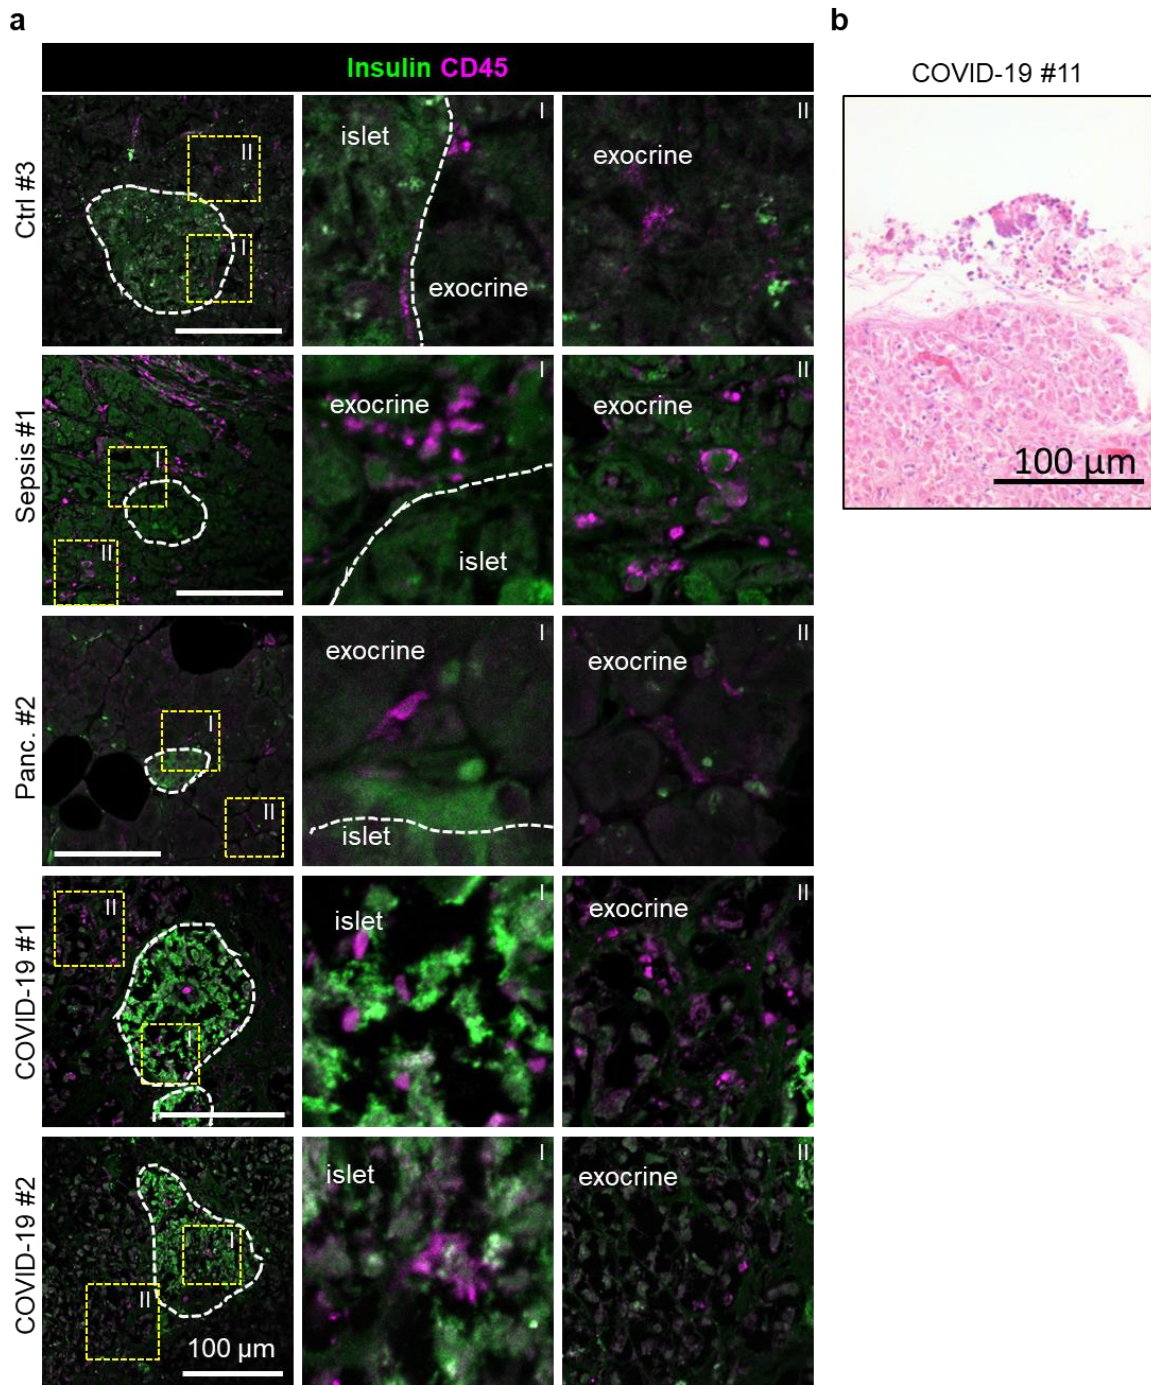

**Supplementary Figure 12. SARS-CoV-2 infection leads to immune cell infiltration in the pancreas.** **a** Immunostainings of pancreas sections from control and COVID-19 patients using antibodies against insulin and CD45. Islets are indicated. Representative images from two independent experiments (n=2) are shown. Scale bars, 100  $\mu$ m. **b** H&E staining showing lymphocytic infiltration in tissue surrounding the pancreas. Representative image from one experiment (n=1) is shown. Scale bar, 100  $\mu$ m.
