# Supplementary material for: Viral infiltration of pancreatic islets in patients with COVID-19
Source: PubMed Central journal article supplement (PMC8192507; doi:10.1038/s41467-021-23886-3), 2021-06-10
Supplement: 41467_2021_23886_MOESM2_ESM.pdf [file 41467_2021_23886_MOESM2_ESM.pdf]

## REVIEWERS' COMMENTS

Reviewer #1 (Remarks to the Author):

Thanks for taking the time to address my comments

We would like to thank reviewer #1 for investing time on reviewing the manuscript again:

“Reviewer #1 (Remarks to the Author):

Thanks for taking the time to address my comments”
